# Supplementary material for: Prognostic impact of measurable residual disease in AML patients treated frontline with azacitidine and venetoclax: results from the French VENAURA registry
Source: Research Square preprint supplement (doi:10.21203/rs.3.rs-7959681/v1), 2025-11-06

Supplemental figure 4 : Overall survival acording LSC<sup>low</sup> vs LSC<sup>high</sup> status at diagnosis

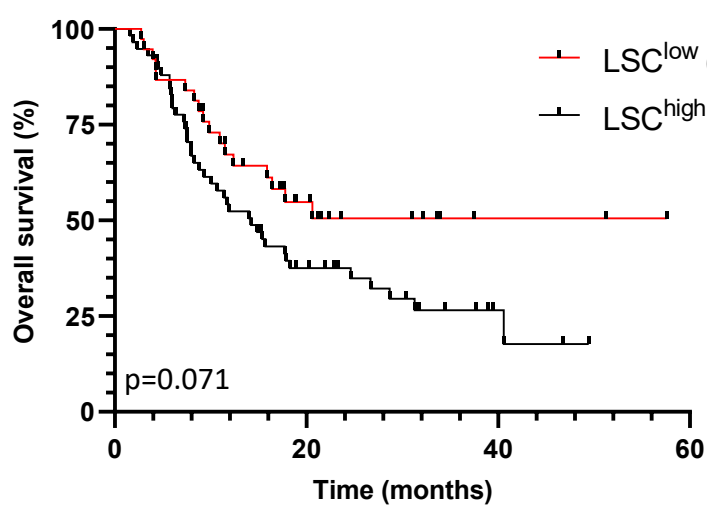

Supplement: Supplementary file 1 [file 41bd7b9ad8b27d79a5da5004.pdf]
