# Supplementary material for: Prognostic impact of measurable residual disease in AML patients treated frontline with azacitidine and venetoclax: results from the French VENAURA registry
Source: Research Square preprint supplement (doi:10.21203/rs.3.rs-7959681/v1), 2025-11-06
Supplement: Supplementary file 2 [file c7729187ffe8dcd5a4f40a57.pdf]

Supplemental figure 1 : Flow chart

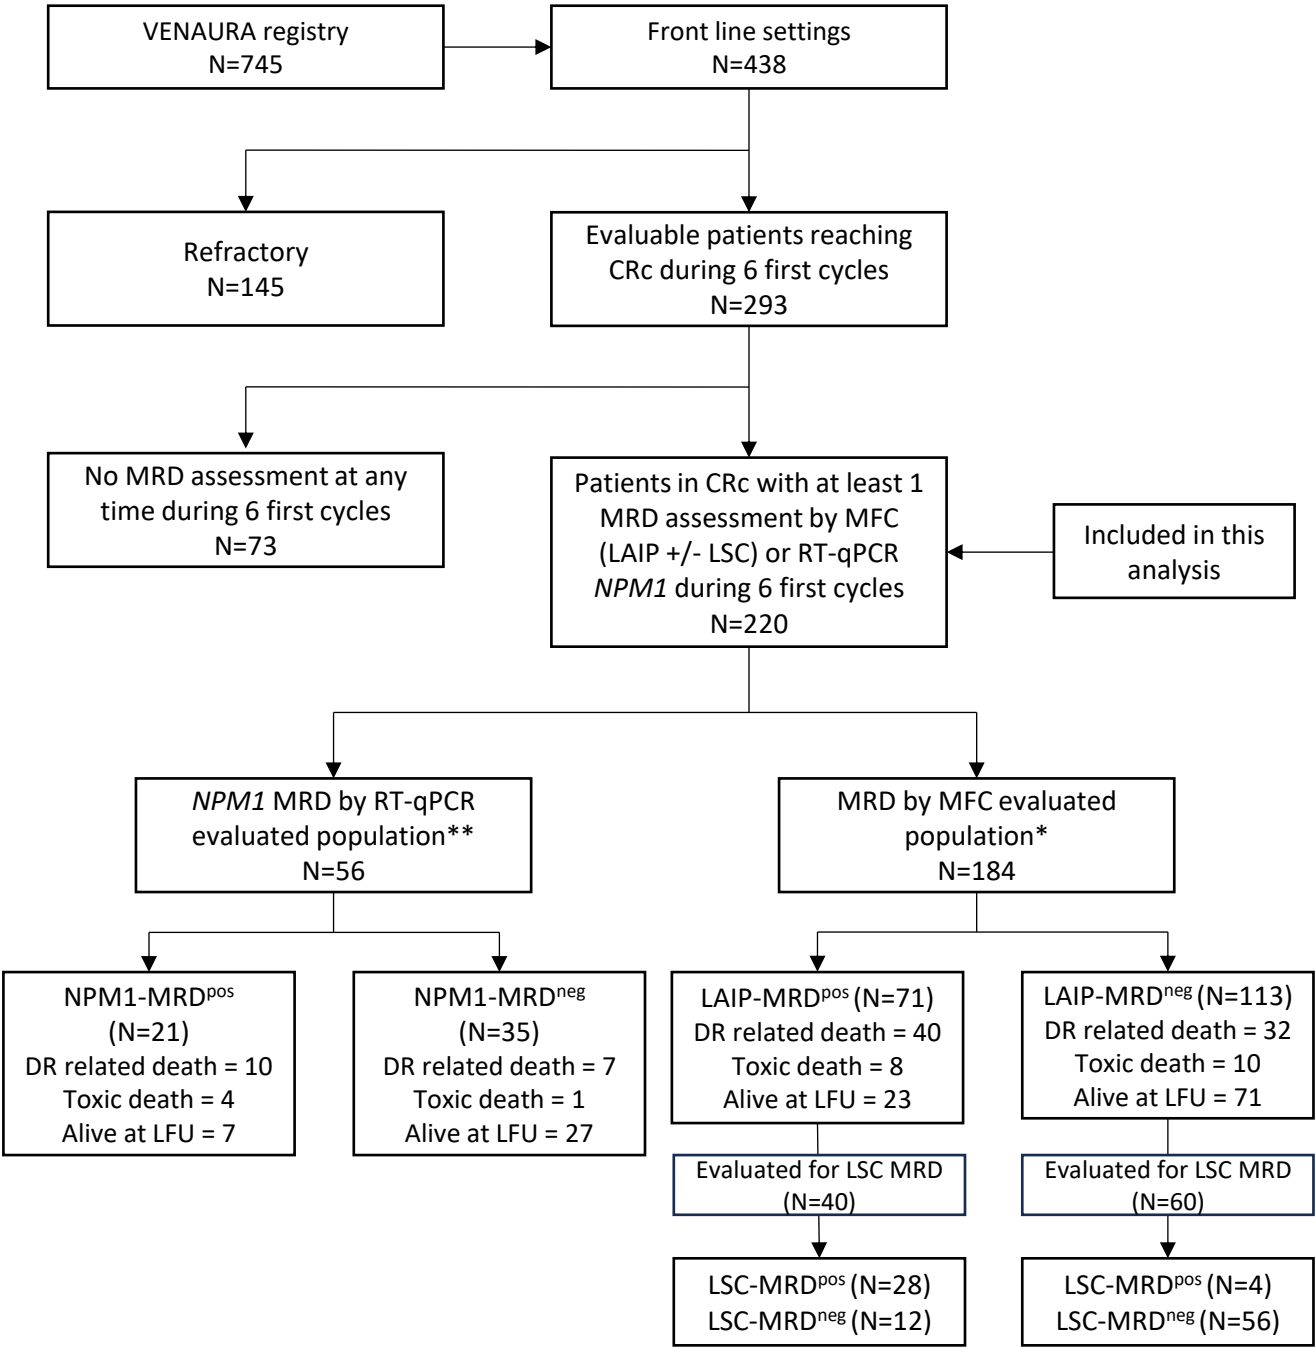

\* Including 20 *NPM1*<sup>mut</sup> patients

\*\* 36 *NPM1*<sup>mut</sup> patients were not evaluated by MFC-MRD and exclusively assessed by RT-qPCR
